# Supplementary figures and images for: Russia as a Microcosm of Arctic Decarbonization: A Data-Driven Framework for Region- Specific Climate Policy in Federated Systems
Source: Research Square preprint supplement (doi:10.21203/rs.3.rs-8652019/v1), 2026-02-11

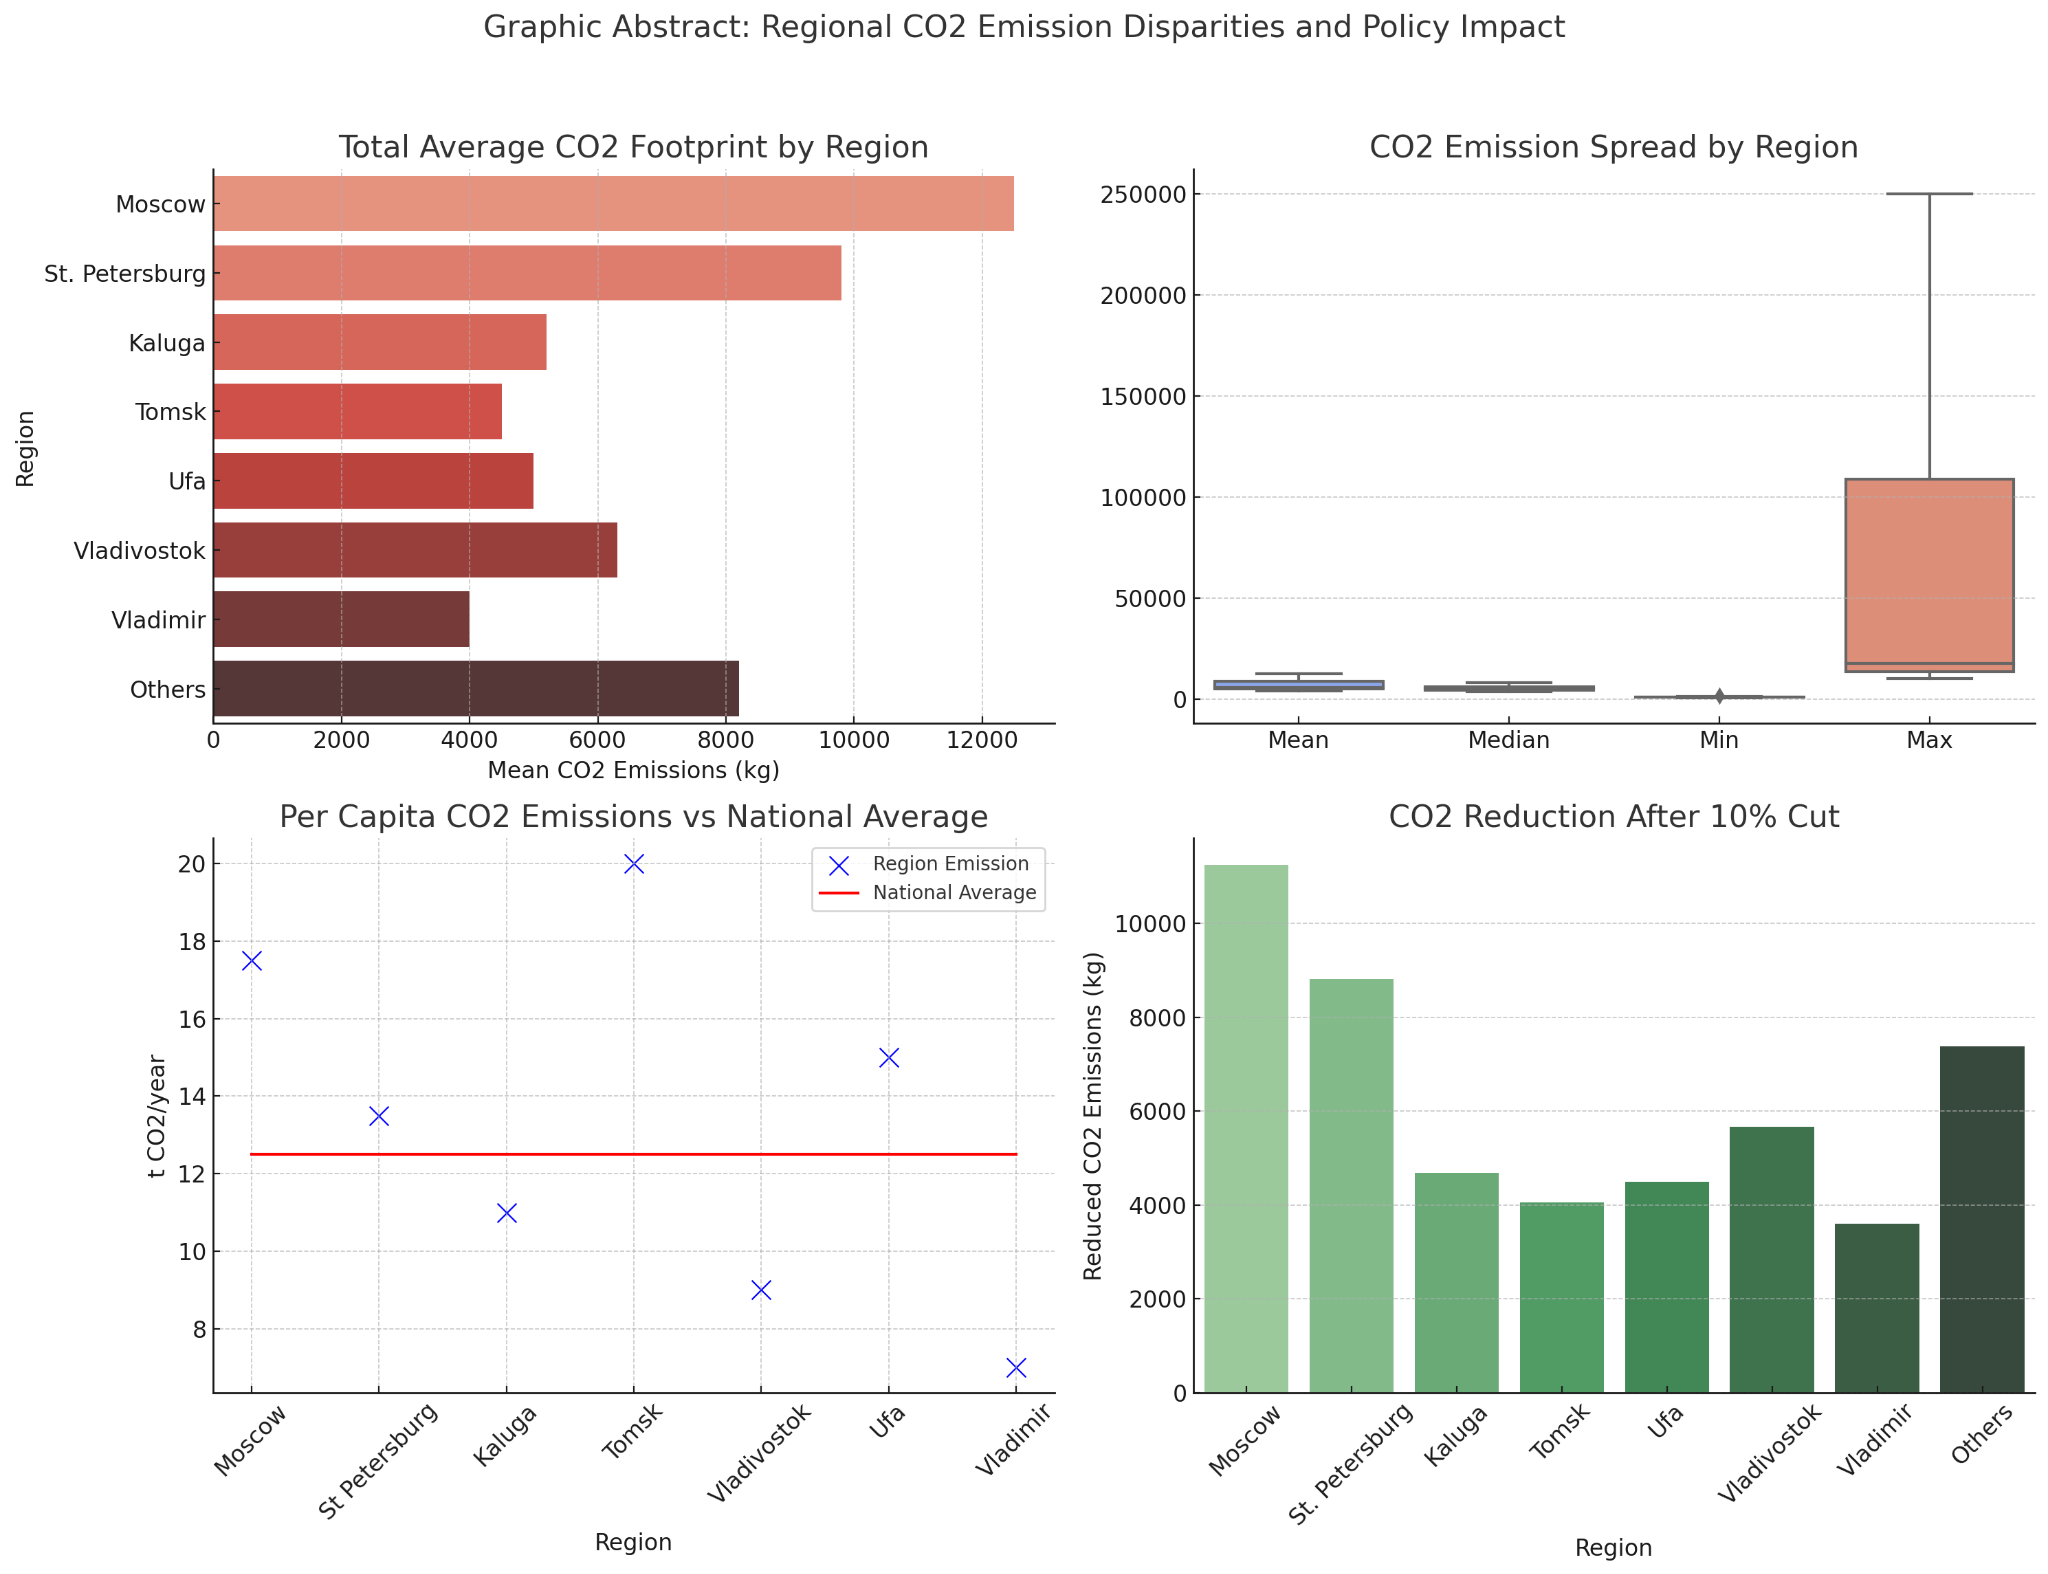

Supplement: Supplementary file 1 [file a165c3989e3cdb0060176bdb.docx]
